# Supplementary material for: Gene Expression Rhythms in the Mussel Mytilus galloprovincialis (Lam.) across an Annual Cycle
Source: PubMed Central journal article supplement (PMC3088662; doi:10.1371/journal.pone.0018904), 2011-05-05
Supplement: pone.0018904.s003.pdf [file pone.0018904.s003.pdf]

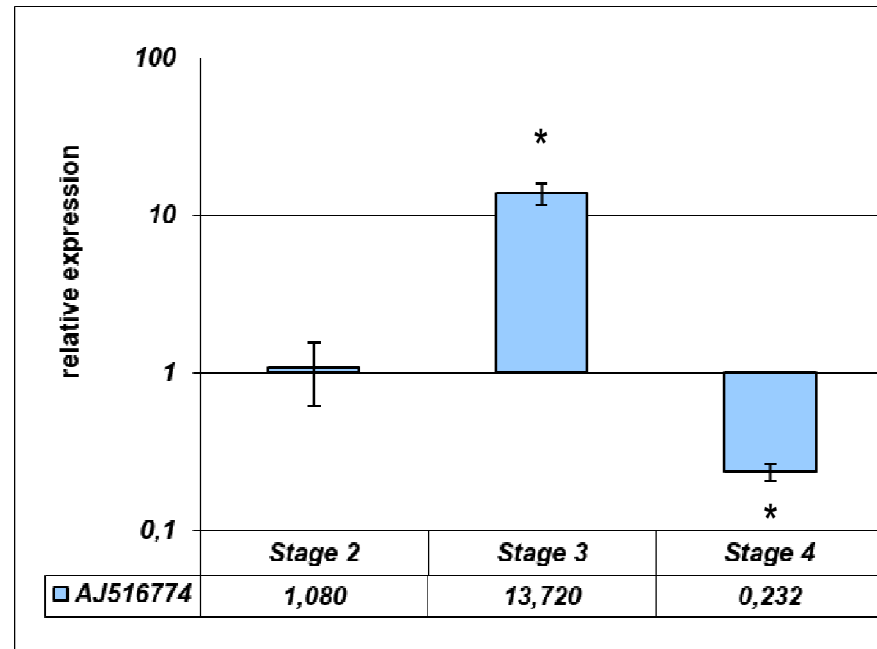

Suppl. Fig 3. Q-PCR confirmation of the annual cycle gene expression trend (male mantle). Shown are the average expression levels  $\pm$  standard deviations relative to the reference condition (Stage 1, early development) for the following gene: AJ516774, acrosomal major protein M7. Data were geometrically normalized against actin and 18S rRNA. \* Statistically different from the reference condition (January),  $p < 0.05$ , random threshold cycle reallocation randomization test according to [53],  $n=4$
